# Supplementary figures and images for: Adjustable high-speed and directional diffusion of water nanodroplets confined by graphene sheets
Source: Royal Society of Chemistry journal article supplement (doi:10.1039/d2cp03421b), 2023-01-01

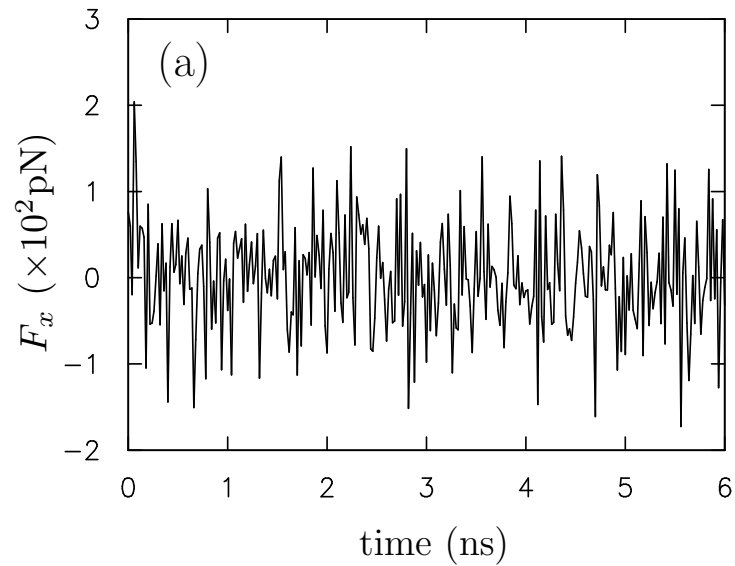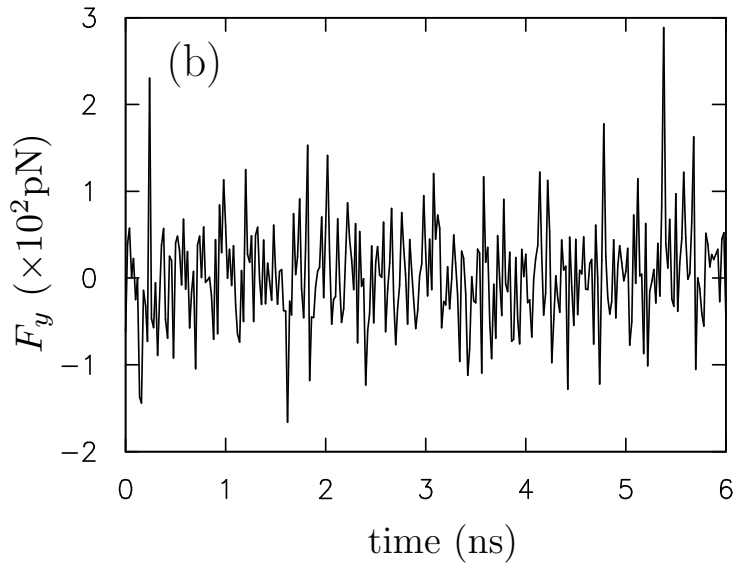

Supplement: d2cp03421b1.zip [file d2cp03421b1.zip]

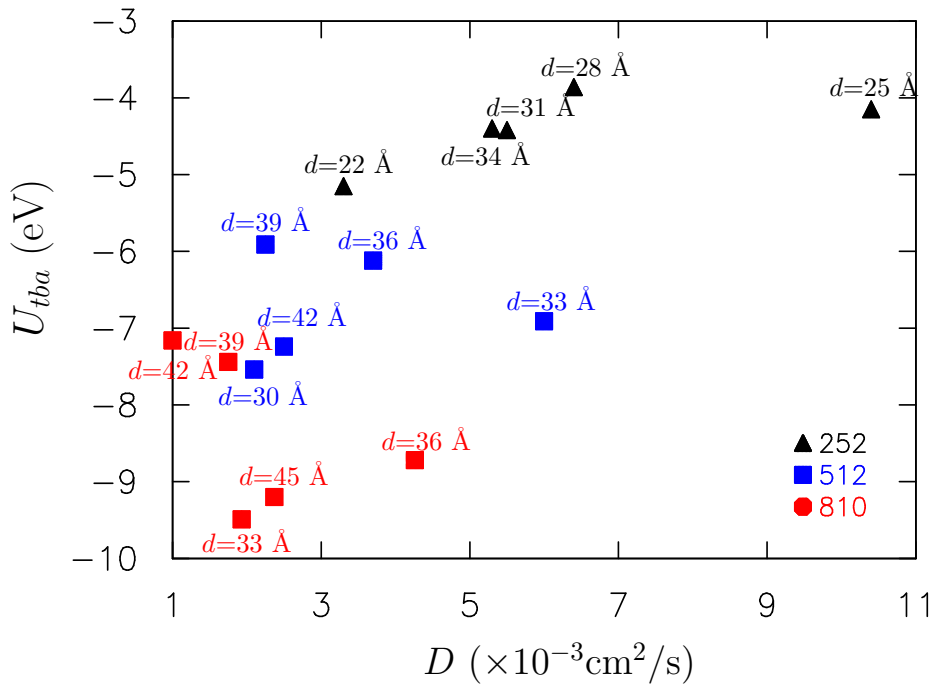

Supplement: d2cp03421b1.zip [file d2cp03421b1.zip]

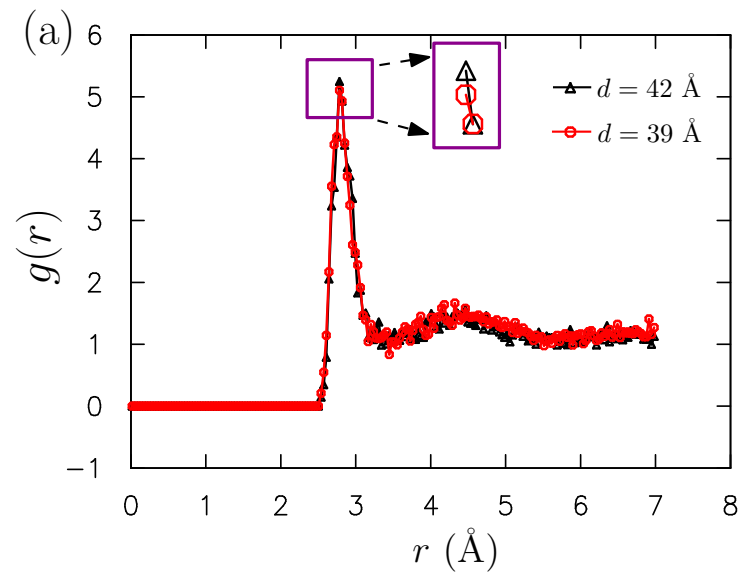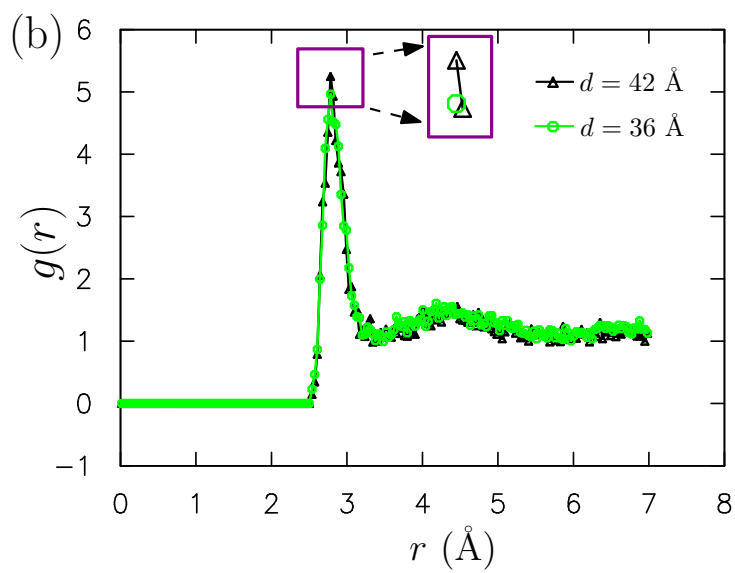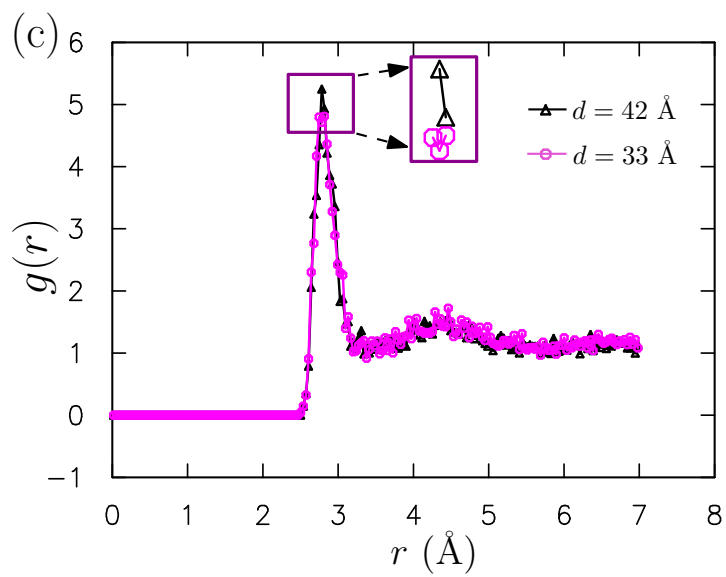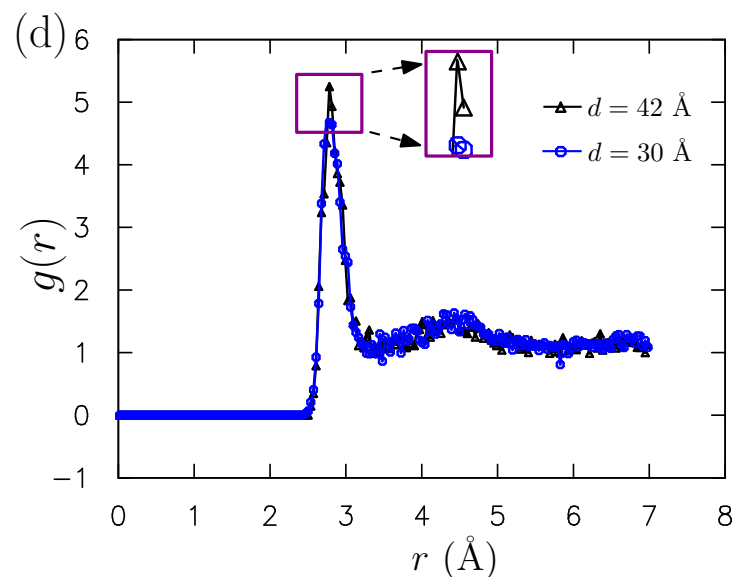

Supplement: d2cp03421b1.zip [file d2cp03421b1.zip]

$D (\times 10^{-3} \text{cm}^2/\text{s})$

■ The first case  
■ The second case

$d (\text{\AA})$

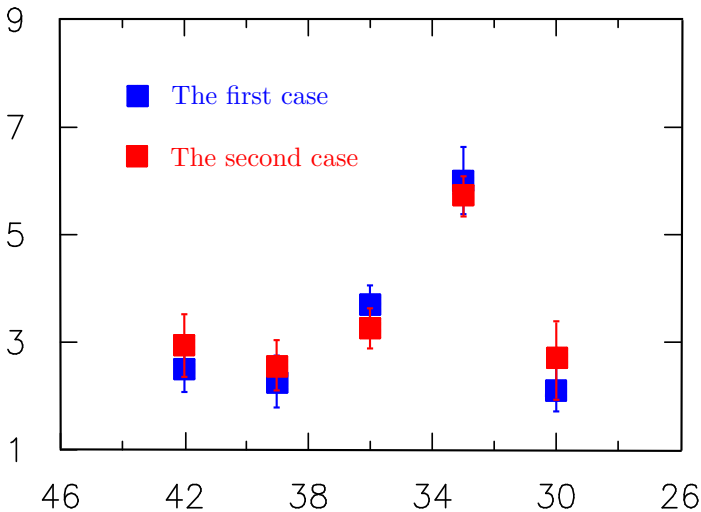

Supplement: d2cp03421b1.zip [file d2cp03421b1.zip]

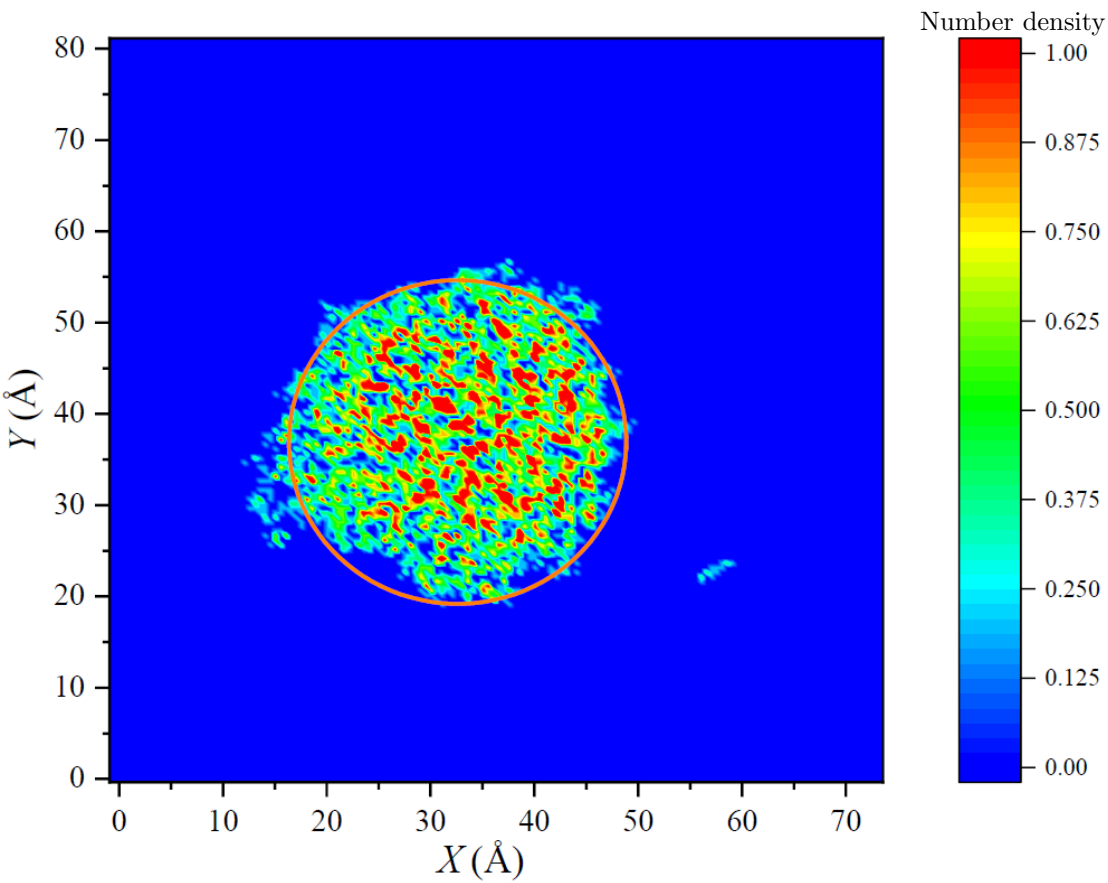

Supplement: d2cp03421b1.zip [file d2cp03421b1.zip]

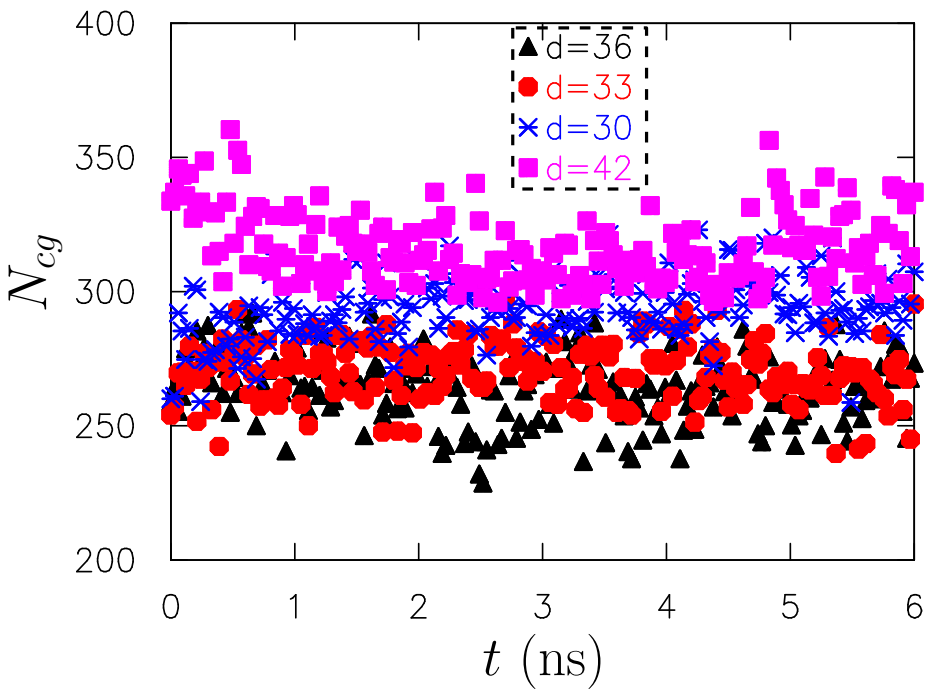

Supplement: d2cp03421b1.zip [file d2cp03421b1.zip]

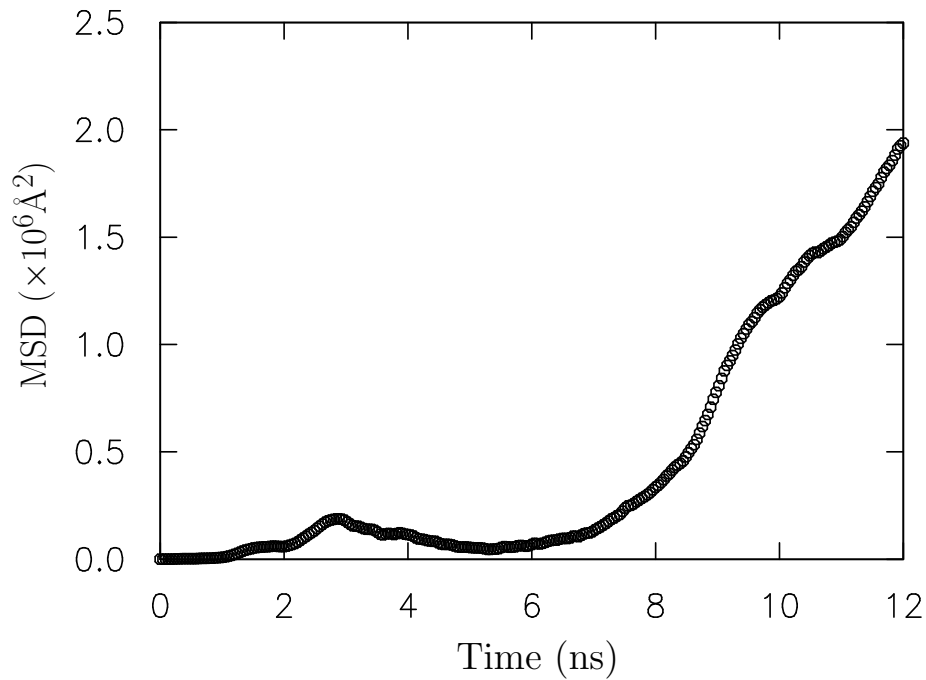

Supplement: d2cp03421b1.zip [file d2cp03421b1.zip]
